# Supplementary material for: Treatment of a Severely Damaged Paper Manuscript of the Tang Dynasty Unearthed from the Western Regions
Source: publisher site journal article supplement (doi:10.1515/res-2022-0017), 2023-02-21
Supplement: Supplementary file 1 [file j_res-2022-0017_suppl_001.docx]

**Acknowledgments**

This work was supported by the Major Planning Project of Renmin University of China “The Collation, Excavation and Rescuing Conservation of Documents Unearthed from the Western Regions” (No. 20XNLG06). This paper was supported by the Museum of Renmin University of China and we would like to express our deepest thanks to Yuqing Hu from the National Library of China for her guidance on conservation techniques and hard work, Shujie Chen and Zeng Gao from the Museum of Renmin University of China for the great support on the project. Last but in no way least, the article cannot be done without the efforts of all people involved in the conservation process and we would like to express my gratitude for the help here.

# Authors

**Chen Yu** is a Ph.D. student in the Information Resource Management School at Renmin University of China. She is majoring in Archival Science and now specializes in the conservation of works on paper and palm leaf manuscripts. She can be reached at yuchen2021@ruc.edu.cn, +86 17200323724(cell phone).

***Corresponding author: Meifang Zhang** is Ph.D., Professor and acted as Visiting scholar at Pittsburgh University from Sep.2006 to Sep.2007. She is the vice-chairman of the Archive Preservation Commission of China and the chairman of the National Image Technology Standard Commission. She is also an expert on ISO TC171 SC1, and the editor of “digital and microfilm image”. She has published 104 articles on the preservation or heritage. Major book publications include *Theory and Practice for Documents Heritage Reservation Management*, *Archives preservation technology*, *Identification of Archives*, *Recording and Storage Technology of Information*, *Treasure of National Archives of Canada(Translate)*, *Prevention and Cure of Achieves Pests*, and *Mounting Technology of Archives in China*. She can be reached at rdmeifang@126.com, +86 13681177333(cell phone).

**Yaya Wang** is a Ph.D. student in the Information Resource Management School at Renmin University of China. She is majoring in Archival Science. She focuses her research on the conservation of the documents unearthed from the Western Regions. She can be reached at 13835138200@163.com, +86 15321373630(cell phone).

**Shujie Chen** is a Librarian in the Museum of Renmin University of China. She focuses her research on the Museology and Paleography. She can be reached at shujie412@163.com, +86 13601161945(cell phone).

**Meng Li** is an archivist in Information Resource Research Center from China Institute of Nuclear Industry Strategy. She is majoring in Archival Science. She focuses her research on the conservation of paper. She can be reached at 18356792196@163.com, +86 17855121553(cell phone).
