# Supplementary material for: Treatment of a Severely Damaged Paper Manuscript of the Tang Dynasty Unearthed from the Western Regions
Source: publisher site journal article supplement (doi:10.1515/res-2022-0017), 2023-02-21
Supplement: Supplementary file 2 [file j_res-2022-0017_suppl_002.docx]

**Material sources**

**Hollytex**

Danqing Paper Industry Co., Ltd, Beijing, China

**Mitsumata paper (5-7 g/m2)**

Ningbo Haishu Dongdong Book Protection Institute Co., Ltd, Zhejiang, China

**Tengujo paper (3g/m2)**

Beiluo Repair Technology Co., ltd, Beijing, China

**Bast paper**

Qianshan County Yi-Fu Mulberry Paper Sales Co., Ltd, Anhui, China

**Xuan paper**

Ningbo Haishu Dongdong Book Protection Institute Co., Ltd, Zhejiang, China

**Thickness Tester (ZHS-4)**

Changchun Yongxin Test Instrument Co., ltd, Jilin, China

**Portable Moisture Tester (SH-01)**

Harbin Yuda Electronic Technology Co., ltd, Heilongjiang, China

**Portable pH Meter (HANNA HI8424)**

Hanna Instrument Co., ltd, Beijing, China
